# Supplementary material
Source: PubMed Central journal article supplement (PMC2651222)
Supplement: NIHMS78985-supplement-01.pdf [file NIHMS78985-supplement-01.pdf]

## Prediagnostic body-mass index, plasma C-peptide concentration, and prostate cancer-specific mortality in men with prostate cancer: a long-term survival analysis

Correspondence to:  
Jing Ma, 181 Longwood Avenue,  
Boston, MA 02115, USA  
jing.ma@channing.harvard.  
edu

|                                                                      | Plasma C-peptide quartile |                 |                 |                 | p value |
|----------------------------------------------------------------------|---------------------------|-----------------|-----------------|-----------------|---------|
|                                                                      | 1                         | 2               | 3               | 4               |         |
| Total patients with prostate cancer, n (%)                           | 207/827 (25.0)            | 206/827 (24.9)  | 208/827 (25.2)  | 206/827 (24.9)  | ..      |
| Pre-PSA era (1982–1990), n (%)                                       | 42/220 (19.1)             | 64/220 (29.1)   | 49/220 (22.3)   | 65/220 (29.5)   | 0.02    |
| PSA era (1991–2007), n (%)                                           | 165/607 (27.2)            | 142/607 (23.4)  | 159/607 (26.2)  | 141/607 (23.2)  | ..      |
| Deaths due to prostate cancer, n (%)                                 | 21/207 (10.1)             | 32/206 (15.5)   | 20/208 (9.6)    | 44/206 (21.4)   | 0.002   |
| Median overall follow-up (range), years                              |                           |                 |                 |                 |         |
| Baseline to diagnosis                                                | 10.3 (0.3–22.6)           | 9.9 (0.0–22.3)  | 10.6 (0.1–23.5) | 9.6 (0.1–23.4)  | ..      |
| Diagnosis to end of follow-up                                        | 11.9 (1.2–22.5)           | 11.1 (0.6–24.1) | 10.8 (0.1–24.2) | 10.2 (0.0–20.1) | ..      |
| Mean age at baseline (SD), years                                     | 57.7 (8.2)                | 59.3 (8.3)      | 58.7 (8.0)      | 60.4 (7.5)      | 0.005   |
| Mean age at diagnosis (SD), years                                    | 68.5 (8.2)                | 69.4 (7.4)      | 69.8 (7.5)      | 70.5 (6.7)      | 0.04    |
| Smoking status at baseline, n (%)                                    |                           |                 |                 |                 |         |
| Non-smoker                                                           | 113/207 (54.6)            | 87/206 (42.2)   | 95/208 (45.7)   | 86/206 (41.7)   | 0.15    |
| Past smoker                                                          | 79/207 (38.2)             | 101/206 (49.0)  | 92/208 (44.2)   | 100/206 (48.5)  | ..      |
| Current smoker                                                       | 15/207 (7.2)              | 18/206 (8.7)    | 21/208 (10.1)   | 20/206 (9.7)    | ..      |
| Baseline diabetes, n (%)                                             | 1/207 (0.5)               | 4/206 (1.9)     | 1/208 (0.5)     | 5/206 (2.4)     | 0.19    |
| Disease stage, n (%)*                                                |                           |                 |                 |                 |         |
| T1/T2                                                                | 174/191 (91.1)            | 160/182 (87.9)  | 167/182 (91.8)  | 160/186 (86.0)  | 0.37    |
| T3/T4                                                                | 13/191 (6.8)              | 14/182 (7.7)    | 9/182 (4.9)     | 14/186 (7.5)    | ..      |
| N1/M1                                                                | 4/191 (2.1)               | 8/182 (4.4)     | 6/182 (3.3)     | 12/186 (6.5)    | ..      |
| Gleason score, n (%)†                                                |                           |                 |                 |                 |         |
| 2–6                                                                  | 139/202 (68.8)            | 120/196 (61.2)  | 136/201 (67.7)  | 127/197 (64.5)  | 0.41    |
| 7                                                                    | 39/202 (19.3)             | 52/196 (26.5)   | 45/201 (22.4)   | 40/197 (20.3)   | ..      |
| 8–10                                                                 | 24/202 (11.9)             | 24/196 (12.2)   | 20/201 (10.0)   | 30/197 (15.2)   | ..      |
| Baseline PSA (ng/mL), n (%)‡                                         |                           |                 |                 |                 |         |
| 4.0–9.9                                                              | 26/123 (21.1)             | 31/132 (23.5)   | 27/121 (22.3)   | 31/141 (22.0)   | 0.98    |
| ≥10                                                                  | 15/123 (12.2)             | 20/132 (15.2)   | 17/121 (14.0)   | 23/141 (16.3)   | 0.81    |
| PSA at diagnosis (ng/mL), n (%)§                                     |                           |                 |                 |                 |         |
| 4.0–9.9                                                              | 76/153 (49.7)             | 67/143 (46.9)   | 72/147 (49.0)   | 56/116 (48.3)   | 0.97    |
| ≥10                                                                  | 55/153 (35.9)             | 61/143 (42.7)   | 56/147 (38.1)   | 49/116 (42.2)   | 0.60    |
| Median plasma C-peptide concentration (10th–90th percentile), ng/mL¶ | 0.8 (0.5–1.0)             | 1.3 (1.0–1.7)   | 2.1 (1.7–2.7)   | 3.9 (2.8–5.9)   | <0.0001 |

\*86 of 827 men (10%) had unknown clinical stage. †31 of 827 men (4%) had unknown Gleason grade. ‡Data for plasma PSA concentrations at baseline were available for 718 men. §Data for plasma PSA concentrations at baseline were available for 718 men. ¶Data for plasma C-peptide concentrations at baseline were available for 827 men.

**Webtable: Characteristics of 827 patients with prostate cancer (1982–2007) by baseline C-peptide quartile**
